# Supplementary material for: Alterations of biomarker profiles after neoadjuvant chemotherapy in breast cancer: tumor heterogeneity should be taken into consideration
Source: PubMed Central journal article supplement (PMC4742218; doi:10.18632/oncotarget.5050), 2015-09-05
Supplement: oncotarget-06-36894-s001.pdf [file oncotarget-06-36894-s001.pdf]

## SUPPLEMENTARY TABLES

**Supplementary Table S1: ER, PR and HER2 changes between pre-NAC core biopsy and post-NAC excision in molecular subtypes of breast cancer**

| Molecular subtype  | N  | ER (mean ± SE) |                |       | PR (mean ± SE) |                |       | HER2 (mean ± SE) |             |       |
|--------------------|----|----------------|----------------|-------|----------------|----------------|-------|------------------|-------------|-------|
|                    |    | pre-NAC        | Post-NAC       | P     | pre-NAC        | Post-NAC       | P     | pre-NAC          | Post-NAC    | P     |
|                    |    |                |                |       |                |                |       |                  |             |       |
| Luminal A          | 14 | 176.07 ± 28.81 | 150.71 ± 31.96 | 0.541 | 123.07 ± 30.52 | 89.64 ± 25.27  | 0.272 | 0.36 ± 0.13      | 0.57 ± 0.23 | 0.257 |
| Luminal B          | 38 | 178.61 ± 16.78 | 165.76 ± 16.18 | 0.193 | 143.84 ± 18.46 | 103.87 ± 18.14 | 0.090 | 0.68 ± 0.13      | 0.92 ± 0.15 | 0.115 |
| HER2 amplification | 21 | 0 ± 0.00       | 5.05 ± 3.34    | 0.068 | 0 ± 0.00       | 0.57 ± 0.34    | 0.102 | 2.90 ± 0.07      | 2.95 ± 0.05 | 0.564 |
| Triple negative    | 13 | 0 ± 0.00       | 0 ± 0.00       | 1.000 | 0 ± 0.00       | 0 ± 0.00       | 1.000 | 0.38 ± 0.14      | 0.69 ± 0.21 | 0.102 |
| Luminal-HER2       | 21 | 132.86 ± 24.81 | 95.52 ± 22.80  | 0.214 | 66.95 ± 22.01  | 21.48 ± 7.96   | 0.073 | 2.86 ± 0.08      | 2.52 ± 0.19 | 0.083 |

**Supplementary Table S2: HER2 status of five breast cancers with discordant reads between biopsies and surgical excisions**

| Case No. | Pre-NAC              | Post-NAC               | Comments                               |
|----------|----------------------|------------------------|----------------------------------------|
| QL-12    | 1+                   | 2+ (HER2/CEP17 = 2.04) | Obvious cell to cell heterogeneity     |
| QL-26    | 0                    | 2+ (HER2/CEP17 = 2.49) | Three tumor components (morphological) |
| QL-25    | 3+                   | 1+                     | Two tumor components (molecular)       |
| QL-32    | 2+(HER2/CEP17 = 3.0) | 0                      | Obvious cell to cell heterogeneity     |
| QL-47    | 2+(HER2/CEP17 = 2.8) | 1+                     | Obvious cell to cell heterogeneity     |

**Supplementary Table S3: Clinicopathological features and biomarker status of 107 breast carcinomas**
